# Supplementary material
Source: Copernicus journal article supplement (doi:10.5194/egusphere-2025-6248)
Supplement: Supplementary file 1 [file egusphere-2025-6248-supplement.pdf]

15 **Supplementary Figures**

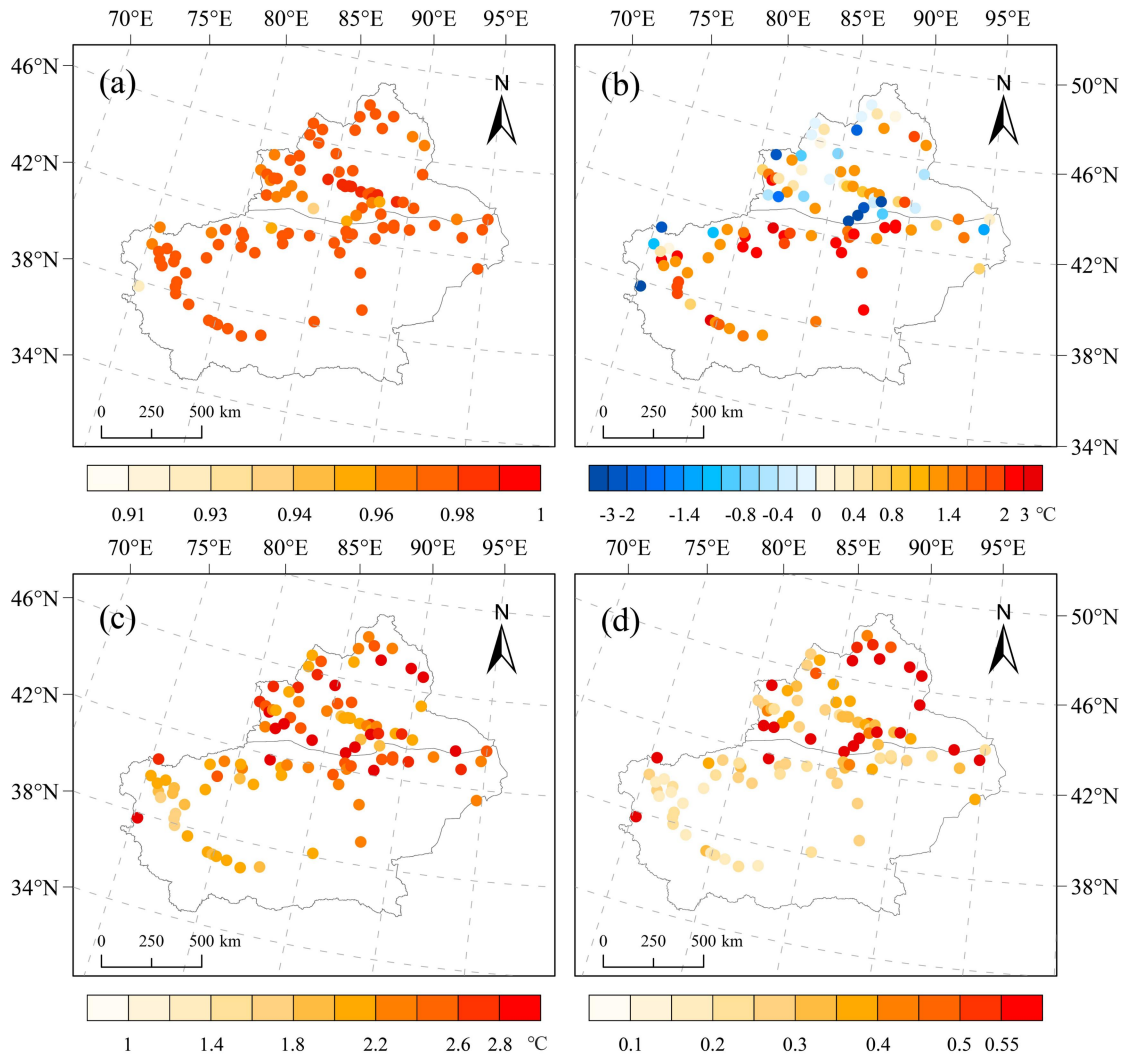

16

17 **Figure S1.** Spatial distribution of correlation coefficient (CC), mean error (ME), root  
 18 mean square error (RMSE), and Distance between Indices of Simulation and  
 19 Observation (DISO) values (a~d) between simulated and station temperature data  
 20 under scheme 14.

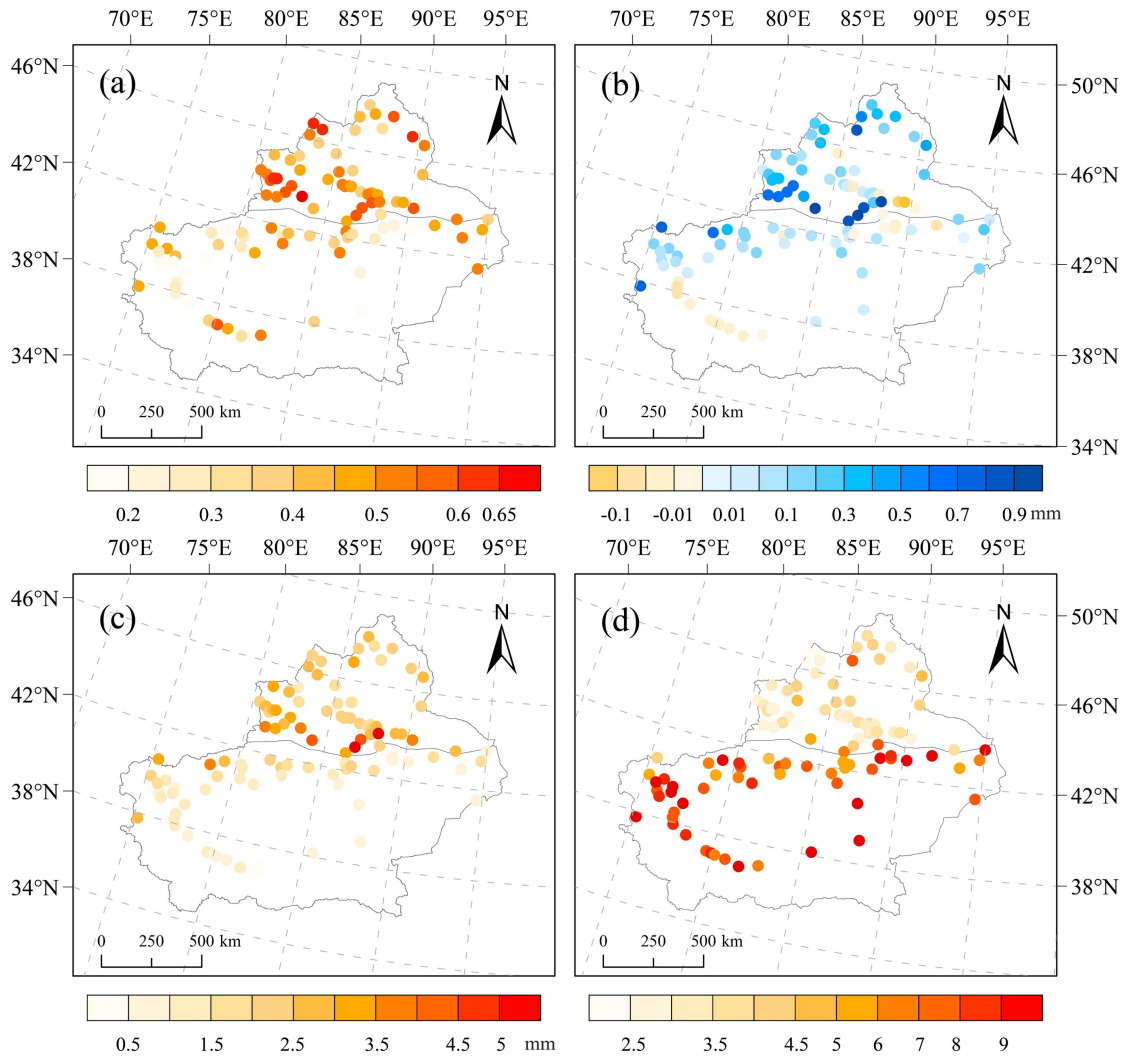

21

22 **Figure S2.** Spatial distribution of CC, ME, RMSE, and DISO values (a~d) between  
 23 simulated and station precipitation data under scheme 23.

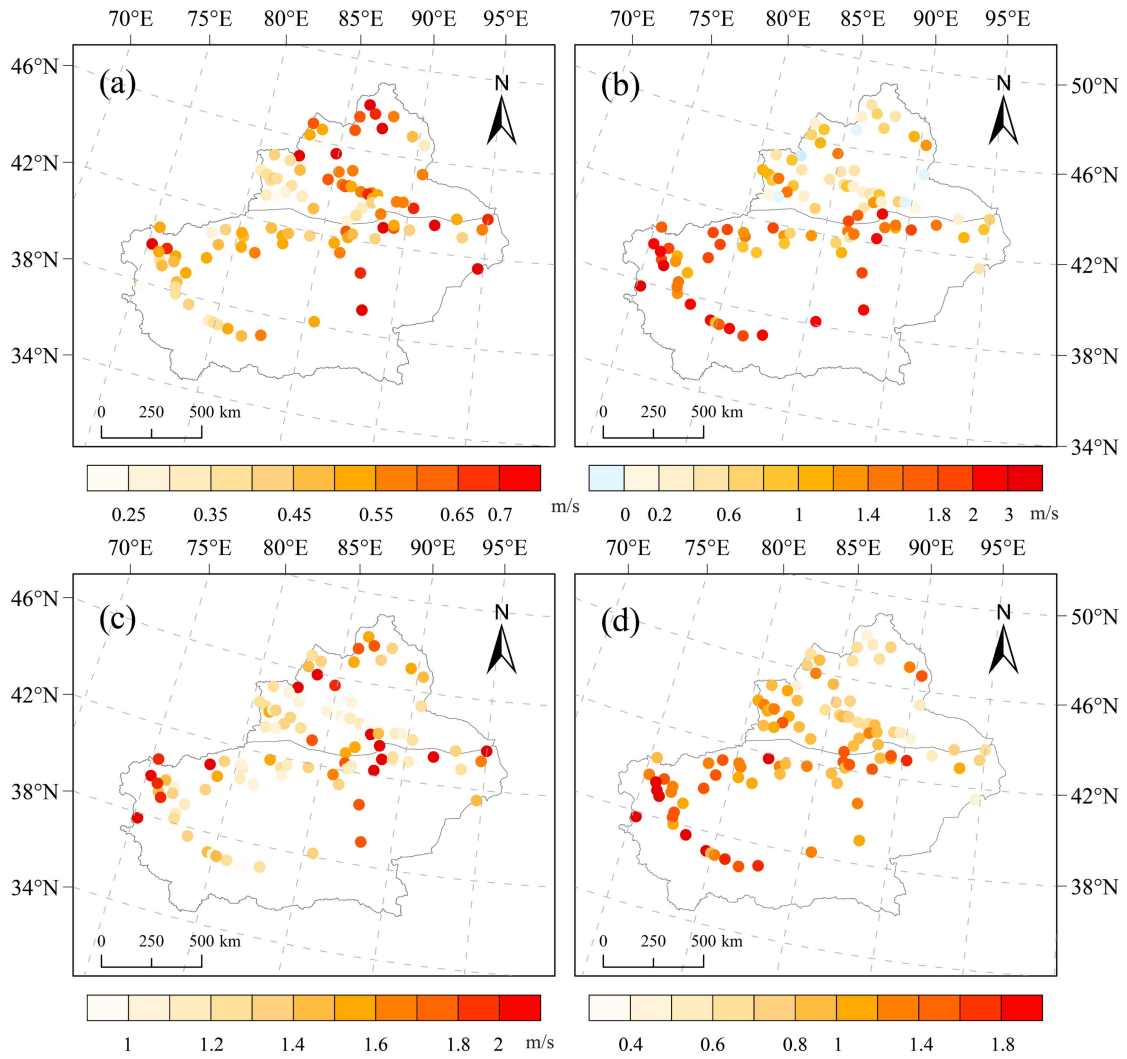

24

25 **Figure S3.** Spatial distribution of CC, ME, RMSE, and DISO values (a~d) between  
 26 simulated and station wind speed data under scheme 12.

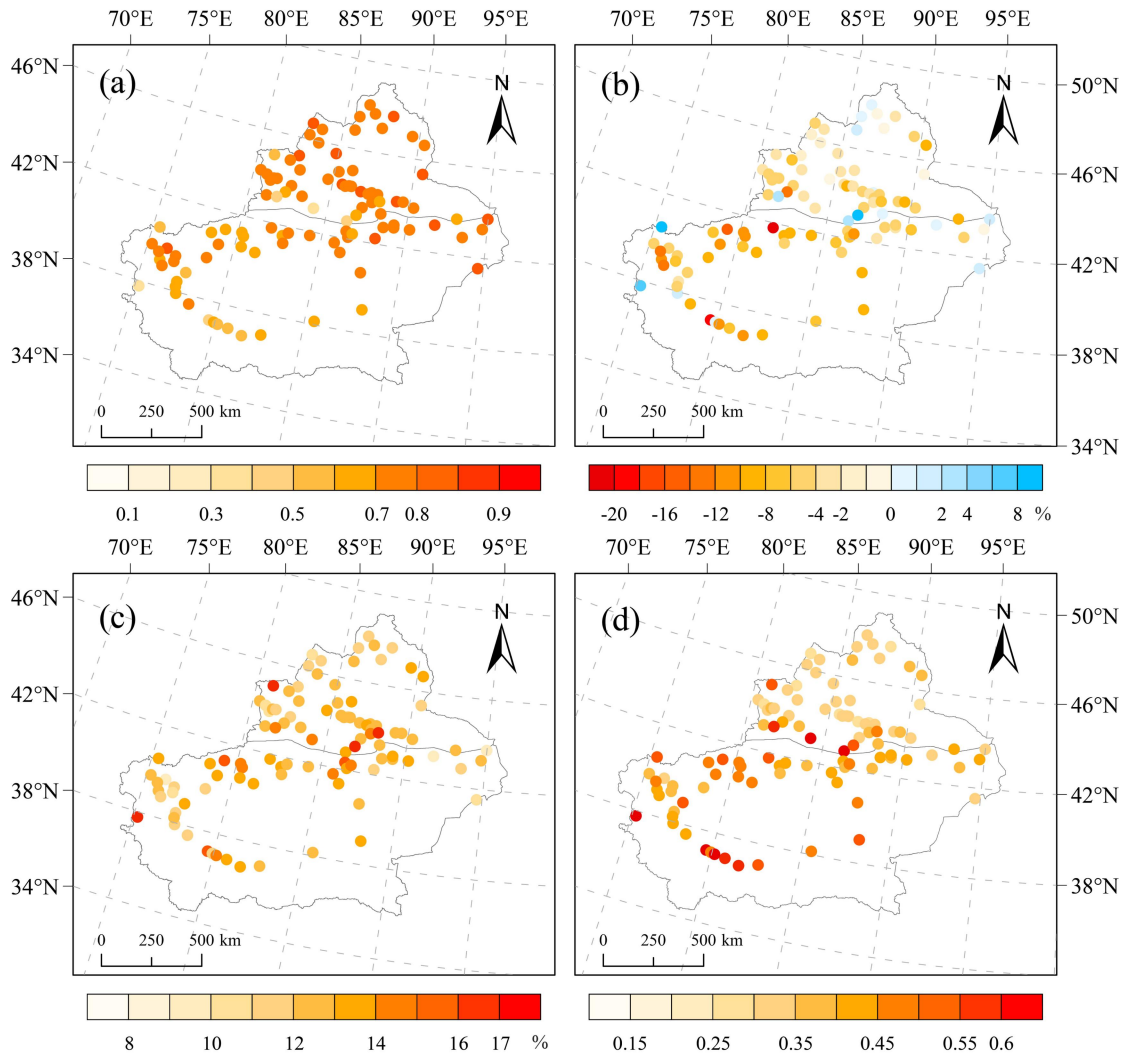

27  
28  
29

**Figure S4.** Spatial distribution of CC, ME, RMSE, and DISO values (a~d) between simulated and station relative humidity data under scheme 12.

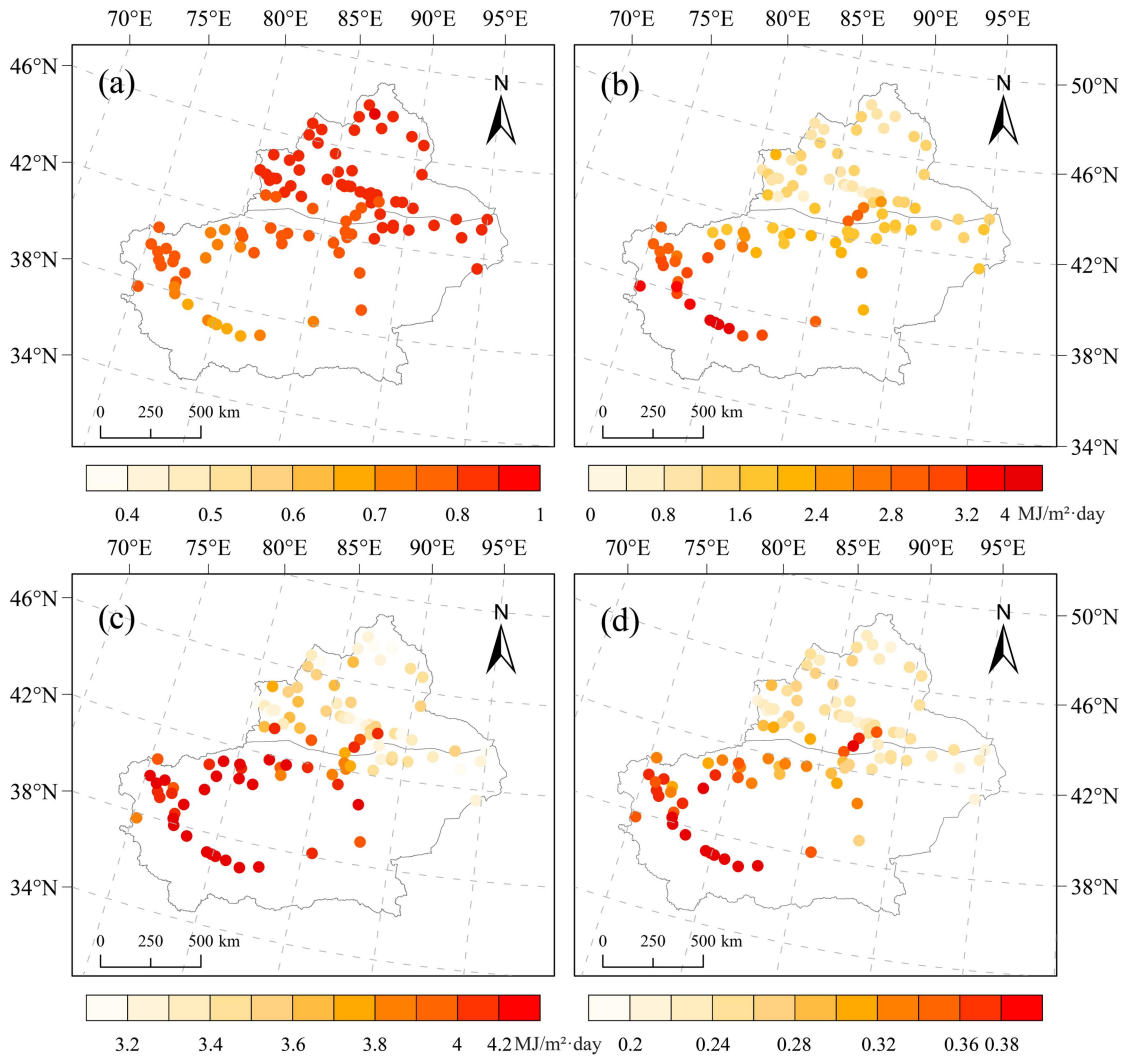

30

31 **Figure S5.** Spatial distribution of CC, ME, RMSE, and DISO values (a~d) between  
 32 simulated and station downward shortwave radiation data under scheme 26.

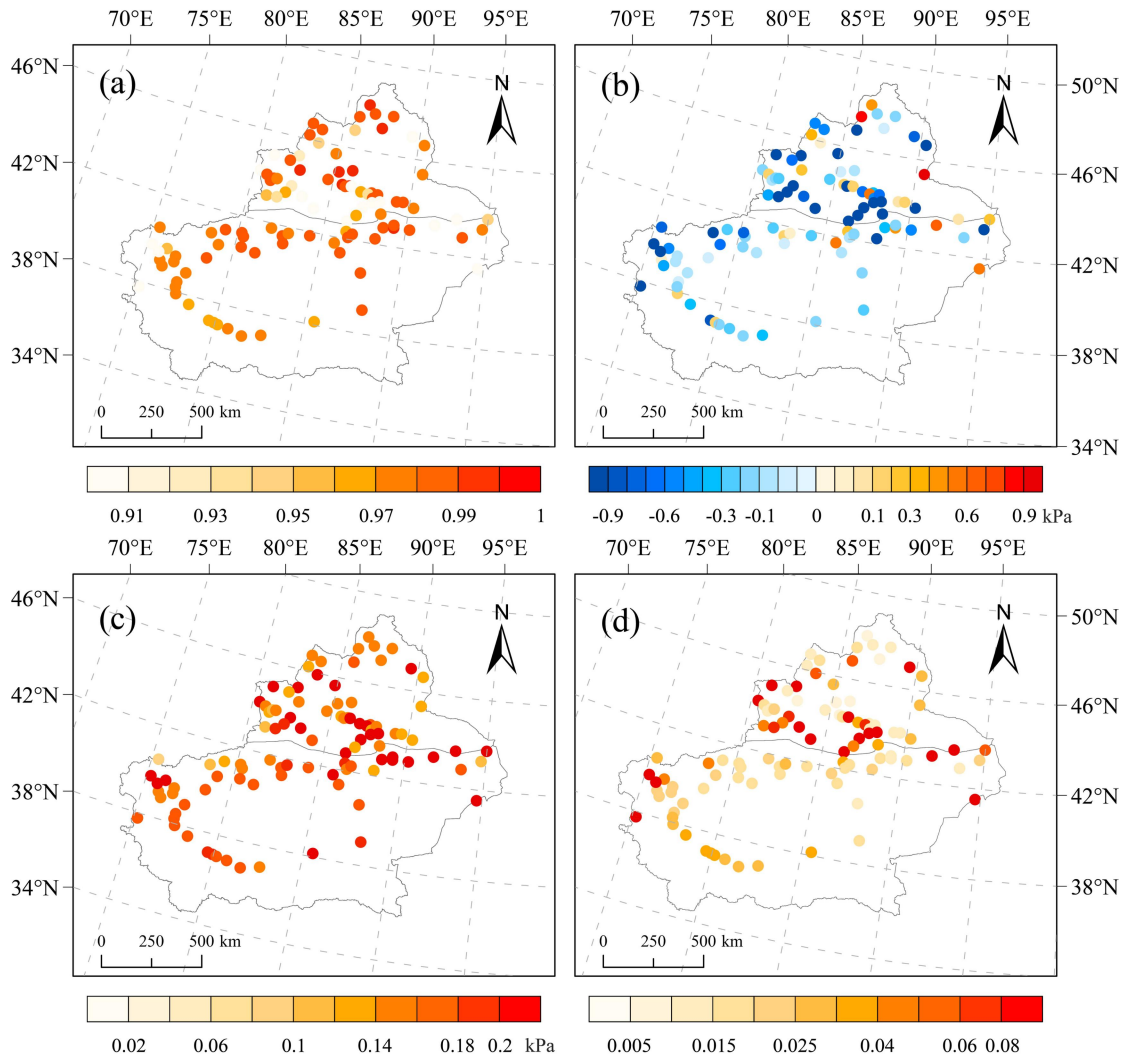

33

34 **Figure S6.** Spatial distribution of CC, ME, RMSE, and DISO values (a~d) between  
 35 simulated and station surface pressure data under scheme 14.

36 **Supplementary Tables**37 **Table S1. Abbreviations and Full Names of Physical Parameterization Schemes**

| Scheme (Abbreviation)   | Full Name                                                       |
|-------------------------|-----------------------------------------------------------------|
| Thompson                | Thompson MErosol-Aware Microphysics Scheme                      |
| Morrison2-moment        | Morrison Two-Moment Microphysics Scheme                         |
| WSM6                    | WRF Single-Moment 6-Class Microphysics Scheme                   |
| WSM3                    | WRF Single-Moment 3-Class Microphysics Scheme                   |
| Lin                     | Lin et al. (1983) Microphysics Scheme                           |
| WSM5                    | WRF Single-Moment 5-Class Microphysics Scheme                   |
| WDM6                    | WRF Double-Moment 6-Class Microphysics Scheme                   |
| NSSL 2-moment           | NSSL Two-Moment Microphysics Scheme                             |
| Kain–Fritsch (new Eta)  | Kain–Fritsch (New Eta) Cumulus Parameterization Scheme          |
| Grell–Freitas           | Grell–Freitas Ensemble Cumulus Scheme                           |
| Grell-3                 | Grell 3D (Grell 1993) Cumulus Scheme                            |
| BMJ                     | Betts–Miller–Janjic Scheme                                      |
| Grell–Devenyi (GD)      | Grell–Dévényi Ensemble Cumulus Scheme                           |
| Multiscale Kain–Fritsch | Multiscale Kain–Fritsch (MSKF) Cumulus Scheme                   |
| SAS                     | Simplified Arakawa–Schubert Scheme                              |
| Tiedtke                 | Tiedtke Cumulus Parameterization Scheme                         |
| RRTM                    | Rapid Radiative Transfer Model (Longwave)                       |
| CAM                     | NCAR Community Atmosphere Model Longwave Radiation Scheme       |
| RRTMG                   | Rapid Radiative Transfer Model for GCMs (Longwave)              |
| GFDL                    | Geophysical Fluid Dynamics Laboratory Longwave Radiation Scheme |
| Goddard                 | NASA Goddard Longwave Radiation Scheme                          |
| Dudhia                  | Dudhia Shortwave Radiation Scheme                               |
| Goddard shortwave       | NASA Goddard Shortwave Radiation Scheme                         |
| CAM                     | NCAR Community Atmosphere Model Shortwave Radiation Scheme      |
| RRTMG                   | Rapid Radiative Transfer Model for GCMs (Shortwave)             |

|                        |                                                                  |
|------------------------|------------------------------------------------------------------|
| FLG (UCLA)             | Fu–Liou–Gu (UCLA) Shortwave Radiation Scheme                     |
| GFDL                   | Geophysical Fluid Dynamics Laboratory Shortwave Radiation Scheme |
| GBM                    | Grenier–Bretherton–McCaa (GBM) PBL Scheme                        |
| ACM                    | Asymmetric Convective Model (ACM2) Scheme                        |
| MYJ                    | Mellor–Yamada–Janjic Scheme                                      |
| YSU                    | Yonsei University Scheme                                         |
| MYNN                   | Mellor–Yamada–Nakanishi–Niino Scheme                             |
| BouLac                 | Bougeault–Lacarrère Scheme                                       |
| UW                     | University of Washington PBL Scheme                              |
| Revised MM5            | Revised MM5 Similarity Surface Layer Scheme                      |
| Noah-MP                | Noah Multi-Physics Land Surface Model                            |
| Thermal Diffusion (TD) | Thermal Diffusion Scheme (1-Layer Soil Model)                    |
| Noah-LSM               | Noah Land Surface Model                                          |
| CLM4                   | Community Land Model Version 4                                   |

---
